# Supplementary material
Source: publisher figshare collection journal article supplement (https://acs.figshare.com/ndownloader/files/4001779)
Supplement: Supplementary file 1 [file 4001779]

**Supporting Information for:**

**Shape and Size Controlled Synthesis of MOF Nanocrystals with the Assistance of Ionic Liquid Microemulsions**

---

Wenting Shang<sup>1,2</sup>, Xincheng Kang<sup>1</sup>, Hui Ning<sup>1</sup>, Jianling Zhang<sup>1</sup>, Xiaogang Zhang<sup>2</sup>, Zhonghua Wu<sup>3</sup>, Guang Mo<sup>3</sup>, Xueqing Xing<sup>3</sup>, Buxing Han<sup>1\*</sup>

1. CAS Key Laboratory of Colloid and Interface and Thermodynamics, Beijing National Laboratory for Molecular Sciences, Institute of Chemistry, Chinese Academy of Sciences

2. Department of Chemistry, Renmin University of China, Beijing 100872, China

3. Institute of High Energy Physics, Chinese Academy of Sciences, Beijing 100049, China

**Results**

**1. The FT-IR spectrum of the MOF shown in Figure 3c**

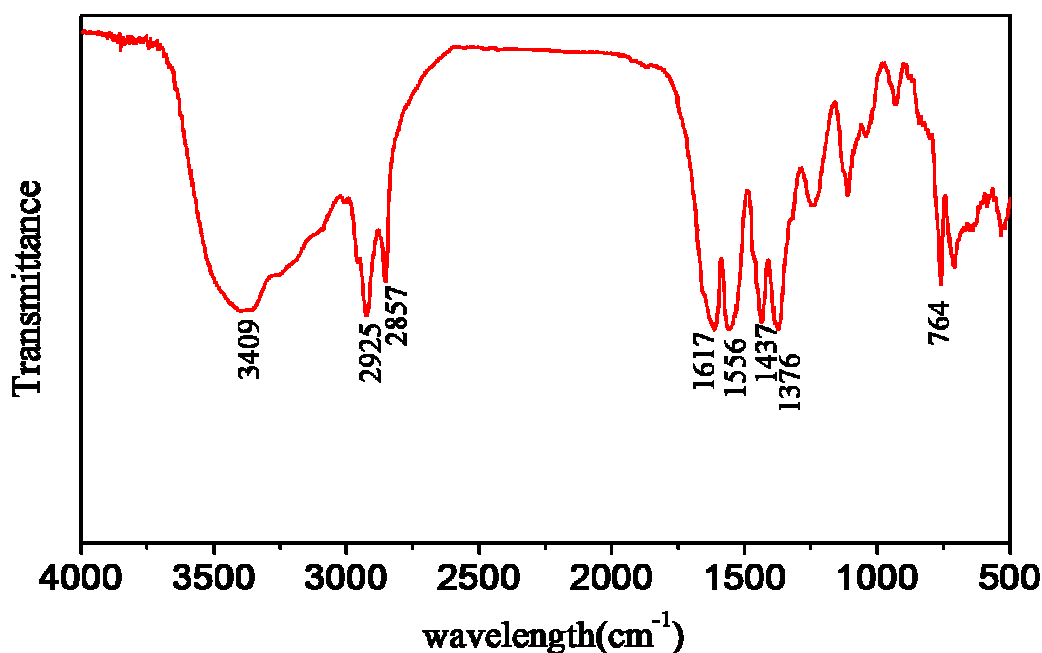

**Figure S1.** FT-IR spectrum of the La(1,3,5-BTC)(H<sub>2</sub>O)<sub>6</sub> MOF shown in Figure 3c,

which was prepared by microemulsion **c** marked in Figure 1.

2. N<sub>2</sub> adsorption-desorption isotherm of the MOF shown in Figure 3c

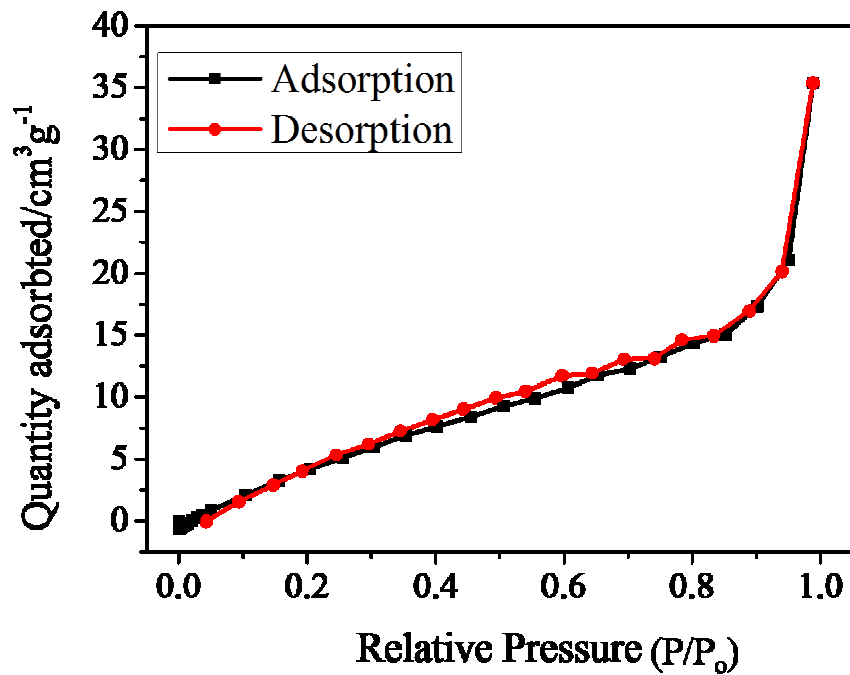

**Figure S2.** N<sub>2</sub> adsorption-desorption isotherm of the La(1,3,5-BTC)(H<sub>2</sub>O)<sub>6</sub> MOF shown in Figure 3c, which was prepared by microemulsion **c** marked in Figure 1.
